# Supplementary material for: Towards evidence-driven strategic training planning: Academic and institutional predictors of student performance among nursing students in Sampa, Ghana
Source: Research Square preprint supplement (doi:10.21203/rs.3.rs-8200694/v1), 2025-12-31
Supplement: Supplementary file 1 [file 46adb3a7d841081bf8aa60f1.pdf]

# Factors Affecting Academic Performance of Nursing Students

Hello! The Research Team of Sampa Nursing Training College is conducting a study to understand the factors affecting academic performance of nursing and midwifery students. This study will help improve academic performance in nursing education. Your participation is voluntary. You may skip any question or exit at any time without penalty. No names, index numbers, or identifying information will be collected. Responses will remain anonymous and used only for academic research. It is estimated that you would take about 10-15 minutes to complete the survey.

*I have read the study information and voluntarily agree to participate*

☐ OK

## Section A: Background & Demographics

### Age

*Please indicate your age in complete years (e.g. 23)*

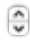

### Sex

☐ Male

☐ Female

### Programme

☐ Registered General Nursing

☐ Registered Midwifery

☐ Community Health Nursing

### Dependants you support financially

*Please enter the number of people that depend on you financially (e.g. 2)*

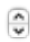

### Year of Study

☐ Year 1

☐ Year 2

☐ Year 3

### Marital Status

- ☐ Single
- ☐ Married
- ☐ Divorced
- ☐ Widowed

### Funding

- ☐ Self
- ☐ Family
- ☐ Scholarship
- ☐ Student loan

### Accommodation

- ☐ On-campus hostel
- ☐ Off-campus hostel
- ☐ With family / guardian

### Do you have a place of study in your residence?

- ☐ Yes
- ☐ No

### What is the average commute (distance of residence to lecture hall)

*Please indicate the distance (one way) from your residence to the lecture hall in metres (e.g. 20)*

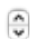

---

### Time taken to commute (time of walking)

*Please indicate the time (in minutes) taken to commute from your residence to the lecture hall (e.g. 6)*

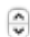

---

### Reliable electricity at residence

- ☐ Yes
- ☐ No

### Internet access for study

- ☐ Personal data
- ☐ Wi-fi (home)
- ☐ Campus wi-fi
- ☐ None

Employment during semester

- ☐ No
- ☐ Yes

If yes, indicate the number of hours per week

e.g. 15

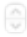

Prior highest qualification (WASSCE score)

Please enter your overall WASSCE aggregate (e.g. 18)

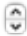

Do you have any disability affecting learning?

- ☐ No
- ☐ Yes

If yes, specify

Section B: Academic Performance (Outcomes)

Last semester GPA

Please enter you GPA for last semester as a number (e.g. 3.2)

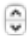

Number of referred / failed courses in the past year

Please enter the number of referred or failed courses in the past year as a number (e.g. 2)

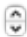

I am satisfied with my academic performance

- ☐ Strongly disagree
- ☐ Disagree
- ☐ Neutral
- ☐ Agree
- ☐ Strongly Agree

**I often meet or exceed my grade targets**

- ☐ Strongly disagree
- ☐ Disagree
- ☐ Neutral
- ☐ Agree
- ☐ Option 5

**I feel at risk of failing this semester**

- ☐ Strongly disagree
- ☐ Disagree
- ☐ Neutral
- ☐ Agree
- ☐ Strongly agree

## **Section C: Study Habits & Time Management**

**I follow a weekly study timetable**

*Please rate your agreement or disagreement to the following statement*

- ☐ Strongly disagree
- ☐ Disagree
- ☐ Neutral
- ☐ Agree
- ☐ Strongly agree

**I review lecture notes within 24-48 hours**

*Please rate your agreement or disagreement to the following statement*

- ☐ Strongly disagree
- ☐ Disagree
- ☐ Neutral
- ☐ Agree
- ☐ Strongly agree

**I start preparing well before exams**

*Please rate your agreement or disagreement to the following statement*

- ☐ Strongly disagree
- ☐ Disagree
- ☐ Neutral
- ☐ Agree
- ☐ Strongly agree

**I often learn at the last minute**

*Please rate your agreement or disagreement to the following statement*

- ☐ Strongly disagree
- ☐ Disagree
- ☐ Neutral
- ☐ Agree
- ☐ Strongly agree

**I set specific goals for each study session**

*Please rate your agreement or disagreement to the following statement*

- ☐ Strongly disagree
- ☐ Disagree
- ☐ Neutral
- ☐ Agree
- ☐ Strongly agree

**Average study hours on weekdays**

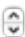

**Average Study hours on weekends**

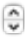

**Section D: Learning Environment & Resources**

**Lecture halls are conducive (noise, seating, ventilation)**

- ☐ Strongly disagree
- ☐ Disagree
- ☐ Neutral
- ☐ Agree
- ☐ Strongly agree

**Skills lab access is adequate (hours, equipment).**

- ☐ Strongly disagree
- ☐ Disagree
- ☐ Neutral
- ☐ Agree
- ☐ Strongly agree

**Library resources (books, journals) meet my needs.**

- ☐ Strongly disagree
- ☐ Disagree
- ☐ Neutral
- ☐ Agree
- ☐ Strongly agree

**E-learning/LMS materials are updated and accessible.**

- ☐ Strongly disagree
- ☐ Disagree
- ☐ Neutral
- ☐ Agree
- ☐ Strongly agree

**I have essential textbooks/materials for my courses.**

- ☐ Strongly disagree
- ☐ Disagree
- ☐ Neutral
- ☐ Agree
- ☐ Strongly agree

## **Section E: Teaching Quality & Assessment**

**Lecturers communicate clearly and are prepared.**

- ☐ Strongly disagree
- ☐ Disagree
- ☐ Neutral
- ☐ Agree
- ☐ Strongly agree

**Teaching methods encourage active learning.**

- ☐ Strongly disagree
- ☐ Disagree
- ☐ Neutral
- ☐ Agree
- ☐ Strongly agree

**Feedback on tests/assignments is timely and useful.**

- ☐ Strongly disagree
- ☐ Disagree
- ☐ Neutral
- ☐ Agree
- ☐ Strongly agree

**Assessment methods are fair and reflect course content.**

- ☐ Strongly disagree
- ☐ Disagree
- ☐ Neutral
- ☐ Agree
- ☐ Strongly agree

**I can access lecturers for academic support.**

- ☐ Strongly disagree
- ☐ Disagree
- ☐ Neutral
- ☐ Agree
- ☐ Strongly agree

## **Section F: Clinical Placement Factors**

**Clinical objectives are clear before placement.**

- ☐ Strongly disagree
- ☐ Disagree
- ☐ Neutral
- ☐ Agree
- ☐ Strongly agree

**I receive adequate supervision/mentorship in clinicals.**

- ☐ Strongly disagree
- ☐ Disagree
- ☐ Neutral
- ☐ Agree
- ☐ Strongly agree

**Clinical workload allows time for study.**

- ☐ Strongly disagree
- ☐ Disagree
- ☐ Neutral
- ☐ Agree
- ☐ Strongly agree

**. Transport to clinical sites is reliable/affordable.**

- ☐ Strongly disagree
- ☐ Disagree
- ☐ Neutral
- ☐ Agree
- ☐ Strongly agree

**Clinical experiences reinforce classroom learning.**

- ☐ Strongly disagree
- ☐ Disagree
- ☐ Neutral
- ☐ Agree
- ☐ Strongly agree

## **Section G: Motivation, Self-Efficacy & Attitudes**



**I believe I can master difficult course content.**

- ☐ Strongly disagree
- ☐ Disagree
- ☐ Neutral
- ☐ Agree
- ☐ Strongly agree

**. I stay motivated even when topics are challenging.**

- ☐ Strongly disagree
- ☐ Disagree
- ☐ Neutral
- ☐ Agree
- ☐ Strongly agree

**I sometimes doubt my ability to succeed academically.**

- ☐ Strongly disagree
- ☐ Disagree
- ☐ Neutral
- ☐ Agree
- ☐ Strongly agree

**I see clear career benefits in performing well now.**

- ☐ Strongly disagree
- ☐ Disagree
- ☐ Neutral
- ☐ Agree
- ☐ Strongly agree

## **Section H: Psychosocial Wellbeing & Stress**

**I feel overwhelmed by academic demands.**

- ☐ Strongly disagree
- ☐ Disagree
- ☐ Neutral
- ☐ Agree
- ☐ Strongly agree

**I manage stress in healthy ways**

- ☐ Strongly disagree
- ☐ Disagree
- ☐ Neutral
- ☐ Agree
- ☐ Strongly agree

**I have strong social support (family/friends/peers).**

- ☐ Strongly disagree
- ☐ Disagree
- ☐ Neutral
- ☐ Agree
- ☐ Strongly agree

**I experience anxiety during tests/exams.**

- ☐ Strongly disagree
- ☐ Disagree
- ☐ Neutral
- ☐ Agree
- ☐ Strongly agree

**I can access counselling/peer support when needed.**

- ☐ Strongly disagree
- ☐ Disagree
- ☐ Neutral
- ☐ Agree
- ☐ Strongly agree

## **Section I: Health, Sleep & Nutrition**

**I feel well-rested for morning classes.**

- ☐ Strongly disagree
- ☐ Disagree
- ☐ Neutral
- ☐ Agree
- ☐ Strongly agree

**I eat regular, balanced meals during the week.**

- ☐ Strongly disagree
- ☐ Disagree
- ☐ Neutral
- ☐ Agree
- ☐ Strongly agree

**Average sleep per night (in hours) during semester**

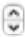

**Ongoing health condition affecting study?**

- ☐ No
- ☐ Yes

**Technology & Digital Distractions**

**I have a reliable device (laptop/tablet) for study.**

- ☐ Strongly disagree
- ☐ Disagree
- ☐ Neutral
- ☐ Agree
- ☐ Strongly agree

**Data costs limit my online learning.**

- ☐ Strongly disagree
- ☐ Disagree
- ☐ Neutral
- ☐ Agree
- ☐ Strongly agree

**Social media distracts me from studying**

- ☐ Strongly disagree
- ☐ Disagree
- ☐ Neutral
- ☐ Agree
- ☐ Strongly agree

**I use digital tools (flashcards, quiz apps) effectively.**

- ☐ Strongly disagree
- ☐ Disagree
- ☐ Neutral
- ☐ Agree
- ☐ Strongly agree

## **Financial & Logistical Constraints**

**I face financial difficulties meeting school needs**

- ☐ Strongly disagree
- ☐ Disagree
- ☐ Neutral
- ☐ Agree
- ☐ Strongly agree

**I can purchase required materials (books, uniforms).**

- ☐ Strongly disagree
- ☐ Disagree
- ☐ Neutral
- ☐ Agree
- ☐ Strongly agree

**Housing/hostel conditions support my study.**

- ☐ Strongly disagree
- ☐ Disagree
- ☐ Neutral
- ☐ Agree
- ☐ Strongly agree

**Unreliable electricity affects my study time (R).**

- ☐ Strongly disagree
- ☐ Disagree
- ☐ Neutral
- ☐ Agree
- ☐ Strongly agree

# Institutional Support & Policies

**Orientation prepared me for academic demands.**

- ☐ Strongly disagree
- ☐ Disagree
- ☐ Neutral
- ☐ Agree
- ☐ Strongly agree

**Remedial/tutorial services are available and helpful**

- ☐ Strongly disagree
- ☐ Disagree
- ☐ Neutral
- ☐ Agree
- ☐ Strongly agree

**Timetables avoid excessive clashes/overloads.**

- ☐ Strongly disagree
- ☐ Disagree
- ☐ Neutral
- ☐ Agree
- ☐ Strongly agree

**The school communicates deadlines clearly.**

- ☐ Strongly disagree
- ☐ Disagree
- ☐ Neutral
- ☐ Agree
- ☐ Strongly agree
